# Supplementary material
Source: bioRxiv or medRxiv preprint supplement (https://www.biorxiv.org/highwire/filestream/92959/field_highwire_adjunct_files/4/302307-3.pdf)
Supplement: Supplementary file [file 302307-3.pdf]

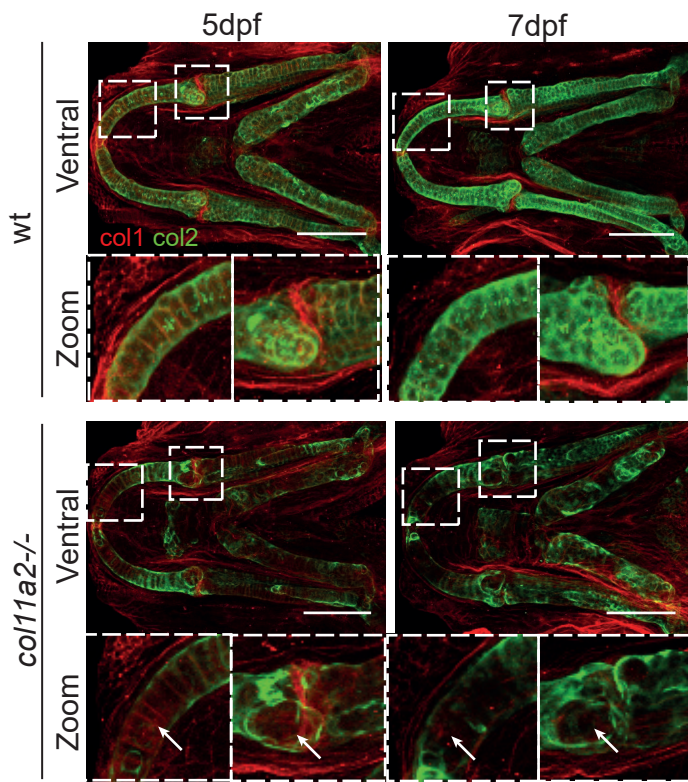

**Supplementary Figure 3: Type I collagen deposition is not perturbed by the absence of type II collagen in *col11a2* mutants.** Immunostaining for type I (red) and type II (green) collagen in wt and *col11a2*<sup>-/-</sup> at 5 and 7 dpf. Dashed insets show areas of type II collagen loss at higher magnification. White arrows indicate areas of type II collagen loss, where type I collagen is unchanged. Scale bar = 100µm.
